# Supplementary figures and images for: Constructing the Microbial Association Network from Large-Scale Time Series Data Using Granger Causality
Source: MDPI journal article supplement (doi:10.3390/genes10030216), 2019-03-14

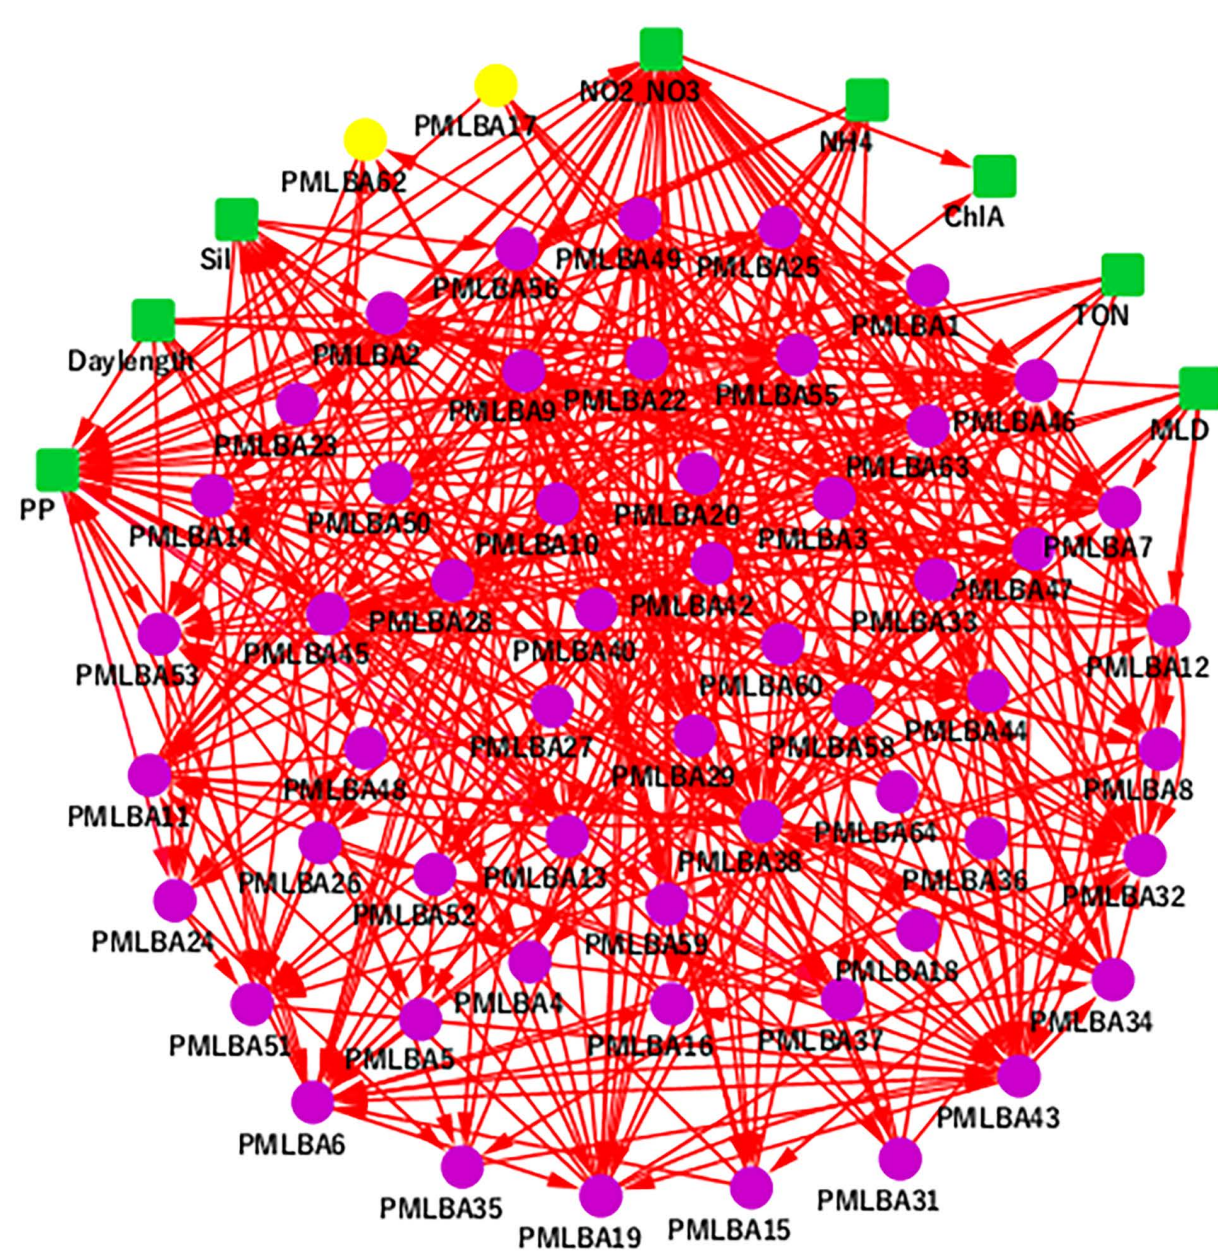

Supplement: s1 [file s1]
